# Supplementary material for: Curcumin exerts anti-tumor activity in colorectal cancer via gut microbiota-mediated CD8+ T Cell tumor infiltration and ferroptosis
Source: Royal Society of Chemistry journal article supplement (doi:10.1039/d4fo04045g), 2025-01-01
Supplement: d4fo04045g3.pdf [file d4fo04045g3.pdf]

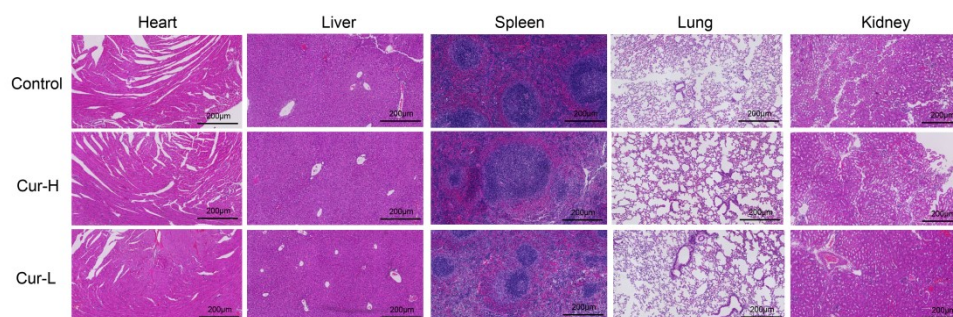

Supplementary Figure S1  
H&E staining of the heart, liver, spleen, lungs, and kidneys

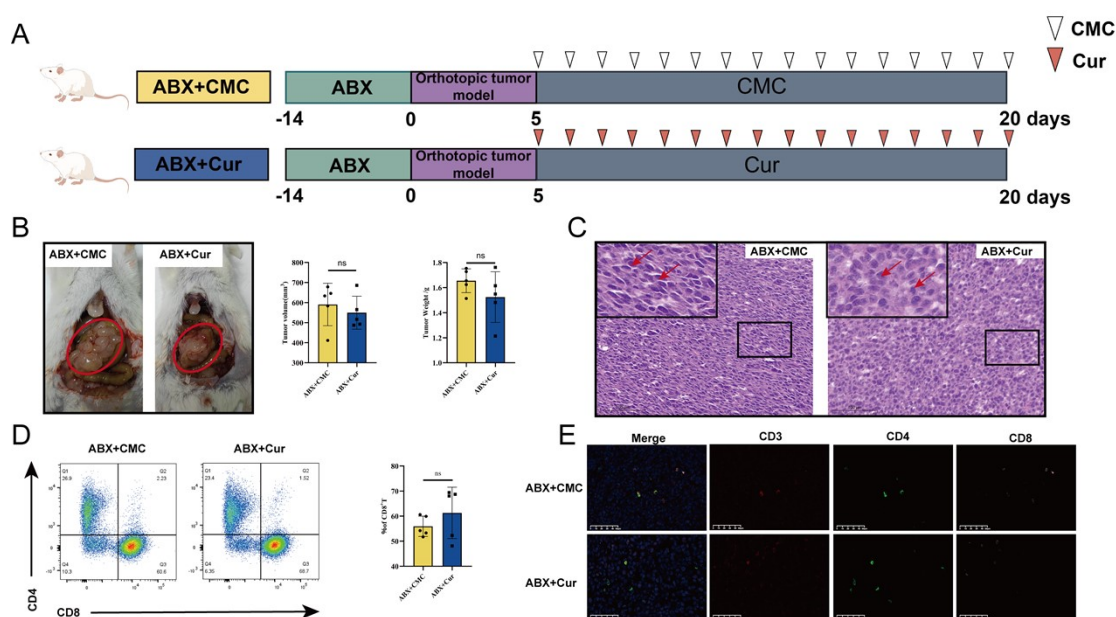

Supplementary Figure S2  
Cur inhibits tumor growth and enhances antitumor immunity in a gut microbiota dependent manner
