# Supplementary figures and images for: Curcumin exerts anti-tumor activity in colorectal cancer via gut microbiota-mediated CD8+ T Cell tumor infiltration and ferroptosis
Source: Royal Society of Chemistry journal article supplement (doi:10.1039/d4fo04045g), 2025-01-01

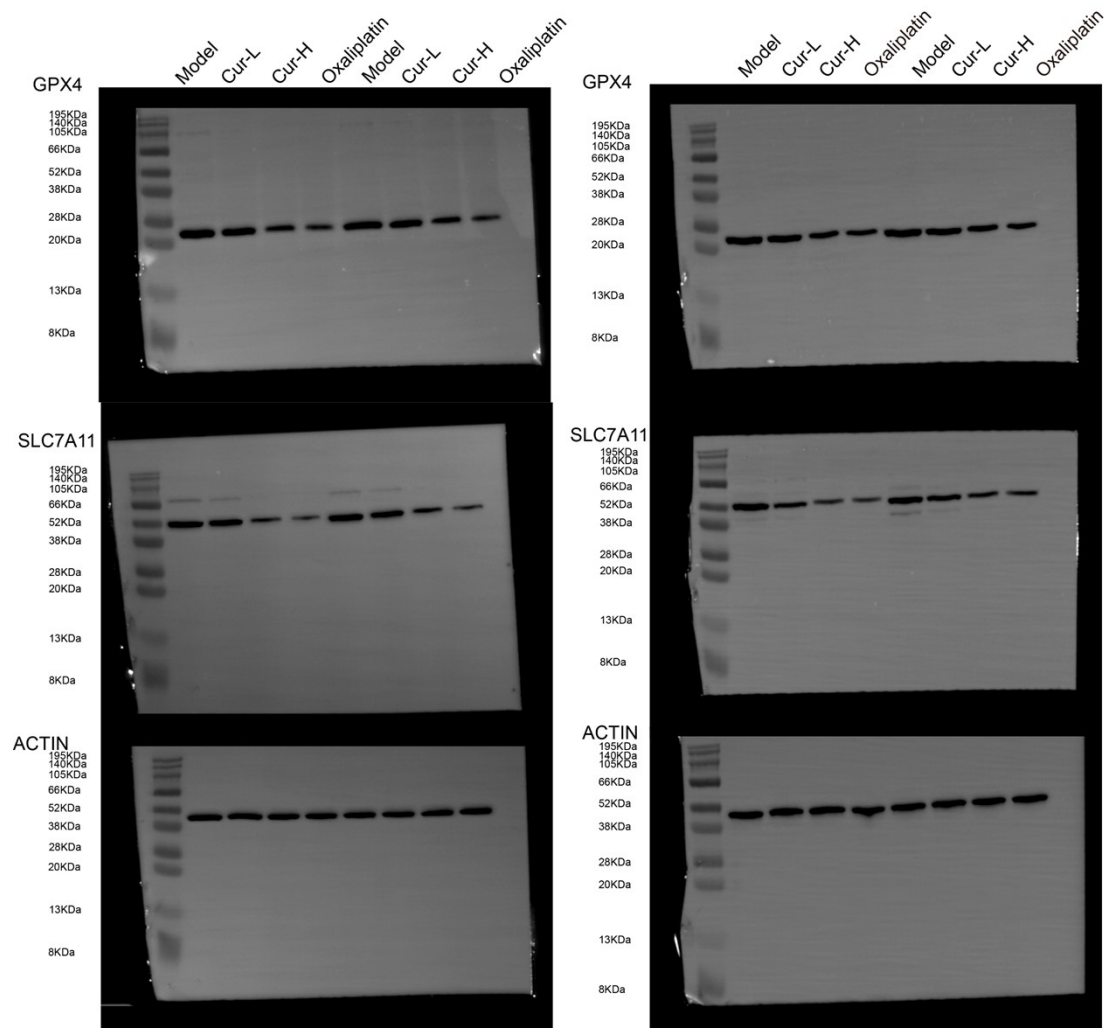

GPX4

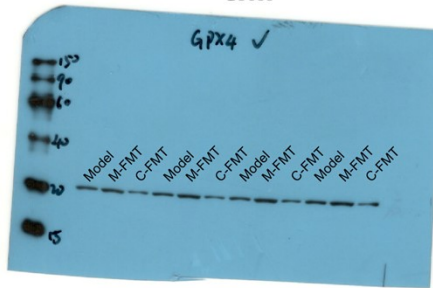

SLC7A11

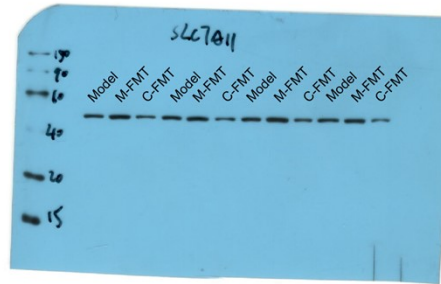

CXCR3

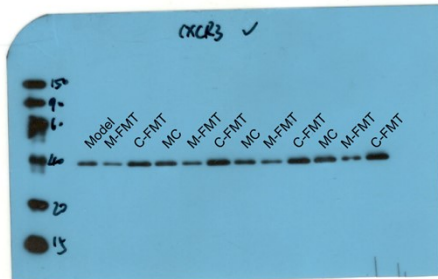

CXCL10

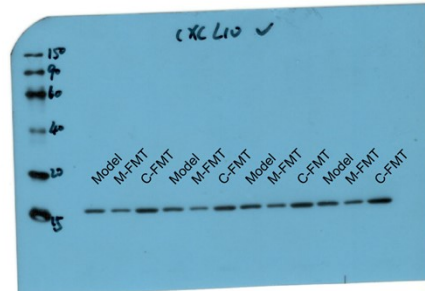

GAPDH

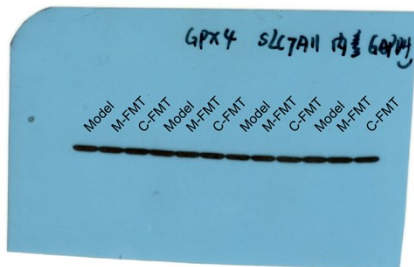

GAPDH

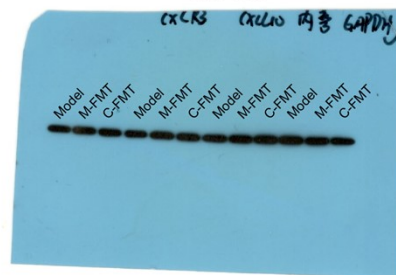

Supplement: d4fo04045g2.pdf [file d4fo04045g2.pdf]
